# Supplementary material
Source: MDPI journal article supplement (https://www.mdpi.com/2073-4352/13/5/752)
Supplement: s1 [file s1]

## Supplementary Materials: Structure and Anharmonicity of $\alpha$ - and $\beta$ -Sb<sub>2</sub>O<sub>3</sub> at Low Temperature

Duncan H. Moseley <sup>1</sup>, Craig A. Bridges <sup>1</sup>, Luke L. Daemen <sup>2</sup>, Qiang Zhang <sup>2</sup>, Michael A. McGuire <sup>1</sup>, Ercan Cakmak <sup>1</sup>, and Raphaël P. Hermann <sup>1,\*</sup>

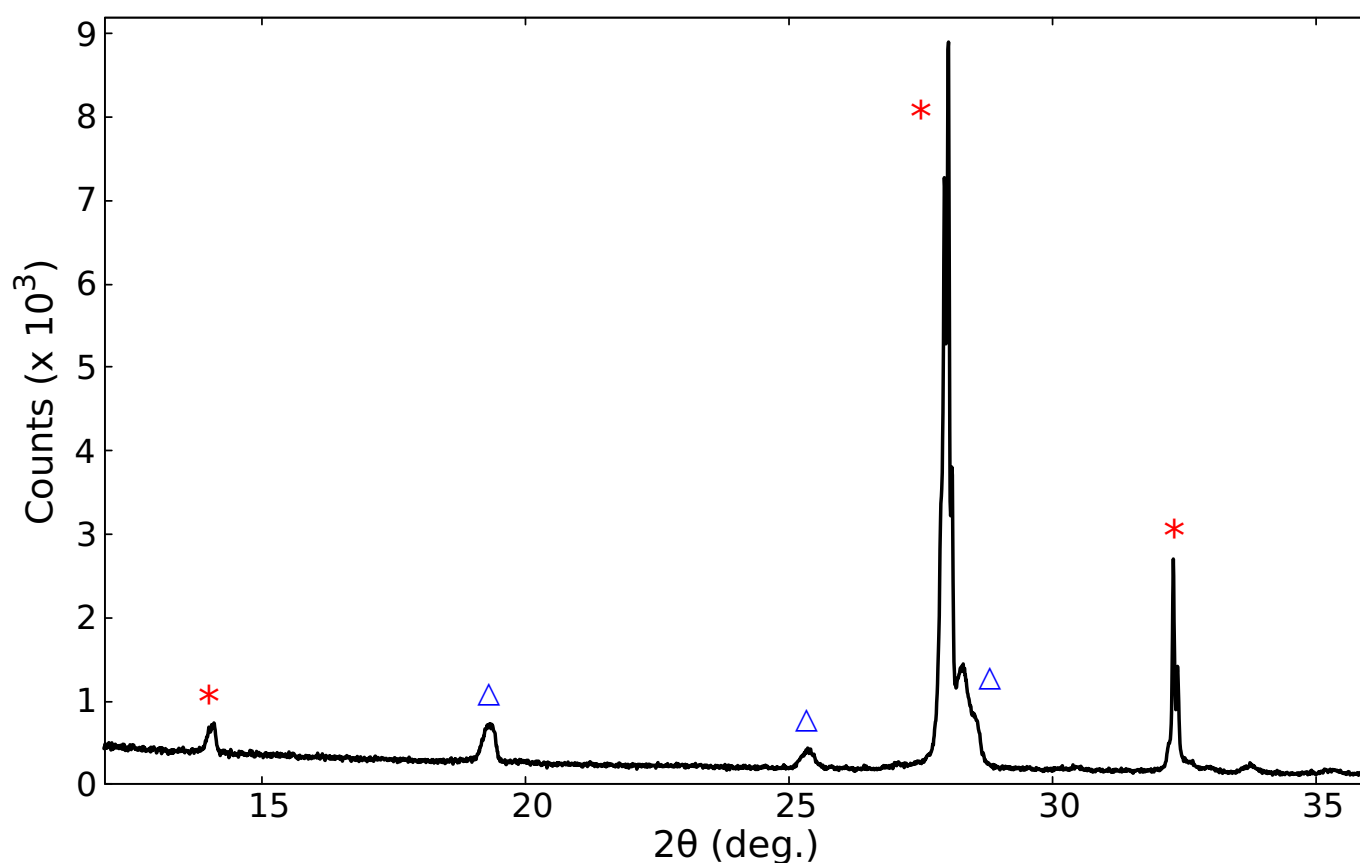

**Figure S1.** Powder x-ray diffraction pattern of commercial Sb<sub>2</sub>O<sub>3</sub> powder. The powder contains a mixture of  $\alpha$  and  $\beta$ , indicated by red asterisks and blue triangles, respectively. Phase mixture can differ between batches.

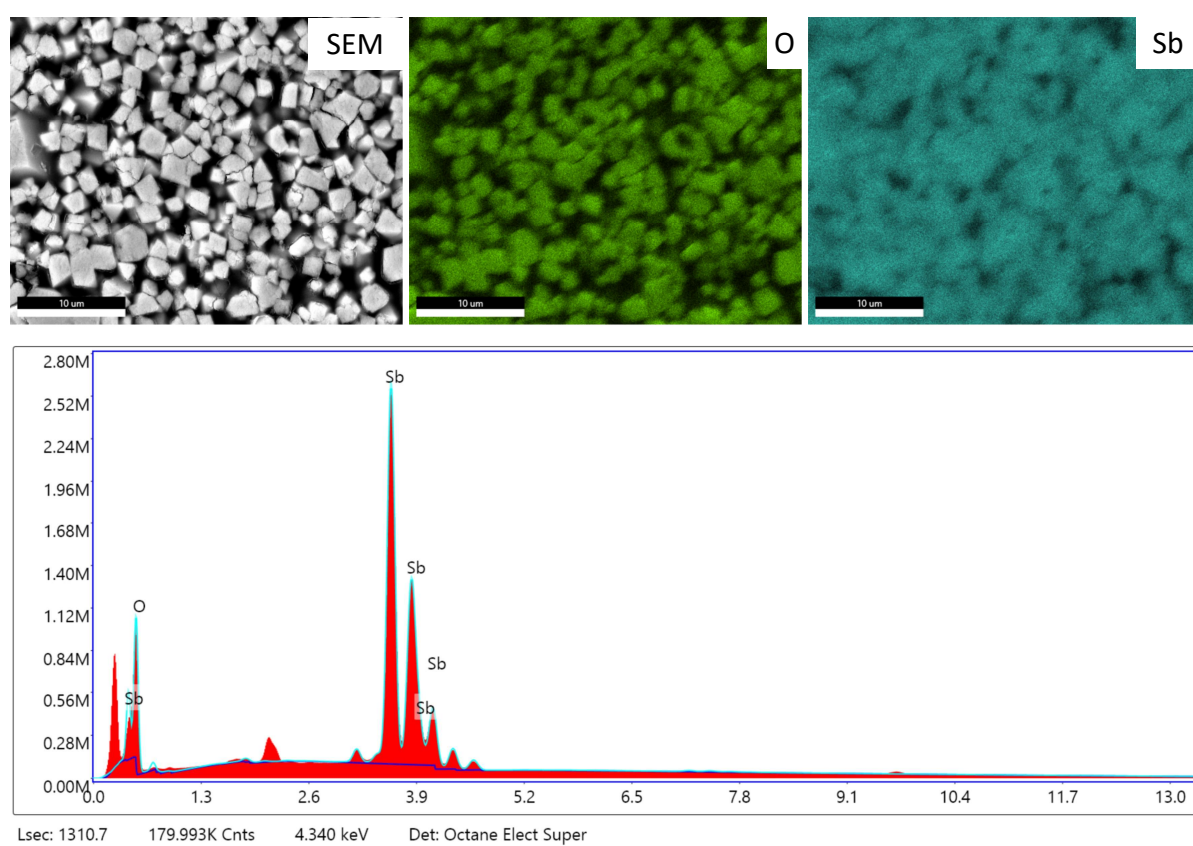

**Figure S2.** SEM images of  $\alpha$ -Sb<sub>2</sub>O<sub>3</sub> with EDS analysis for both O and Sb atoms.

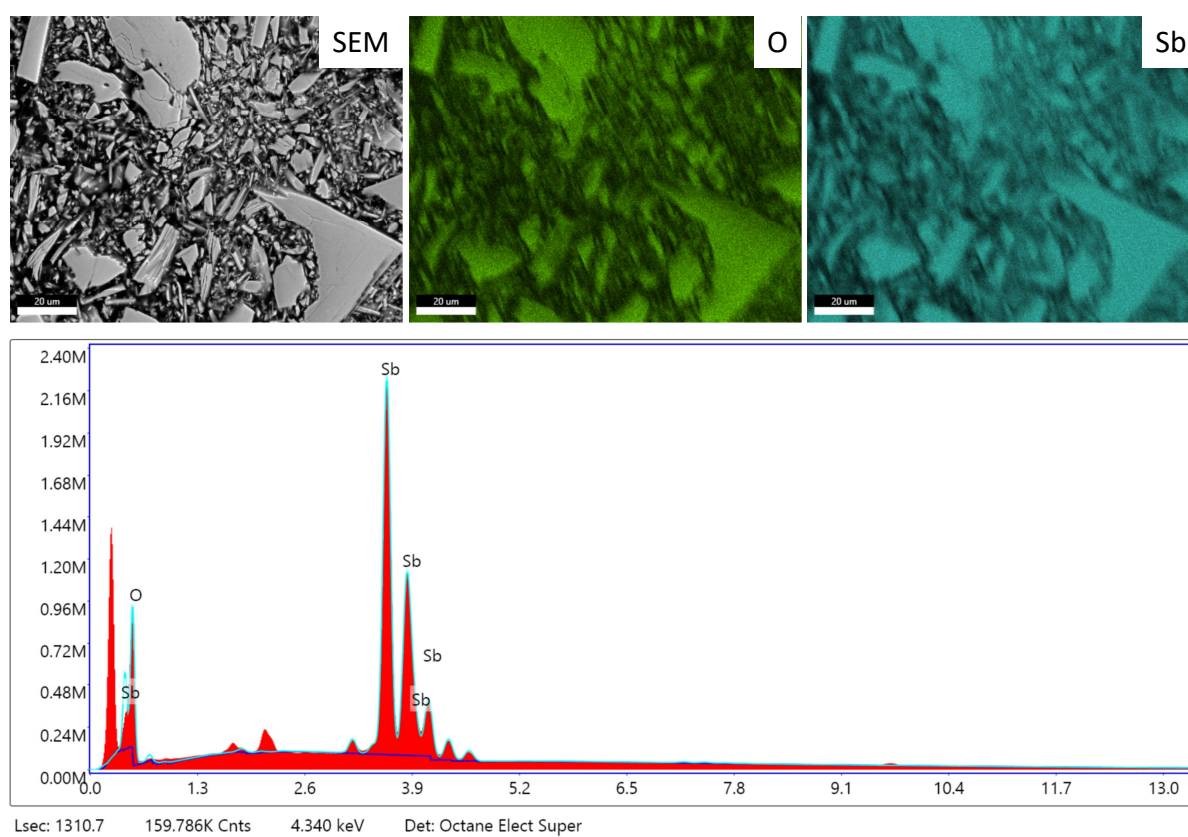

**Figure S3.** SEM images of  $\beta$ -Sb<sub>2</sub>O<sub>3</sub> with EDS analysis for both O and Sb atoms.

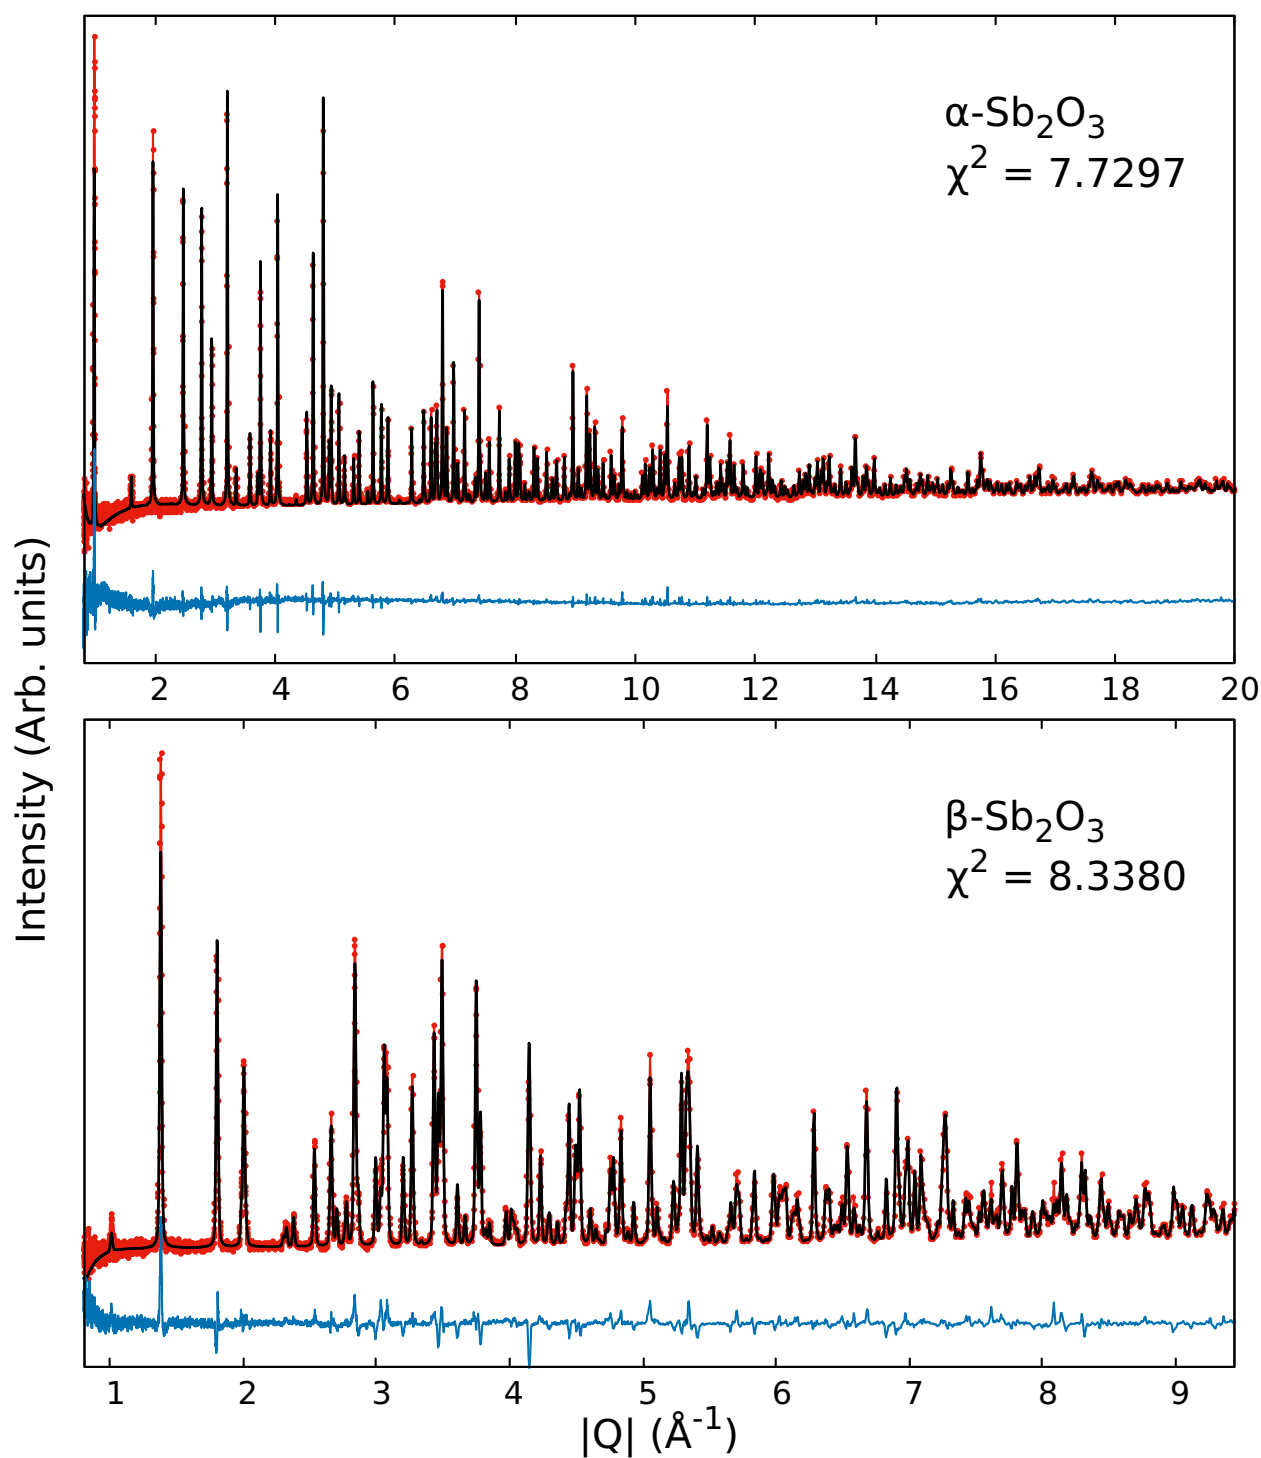

**Figure S4.** (Red points) Powder neutron diffractograms in  $q$ -space of (Top)  $\alpha$ - and (Bottom)  $\beta$ - $\text{Sb}_2\text{O}_3$  and (black curves) Rietveld fit at 20 K. Blue curves are fitting residuals.

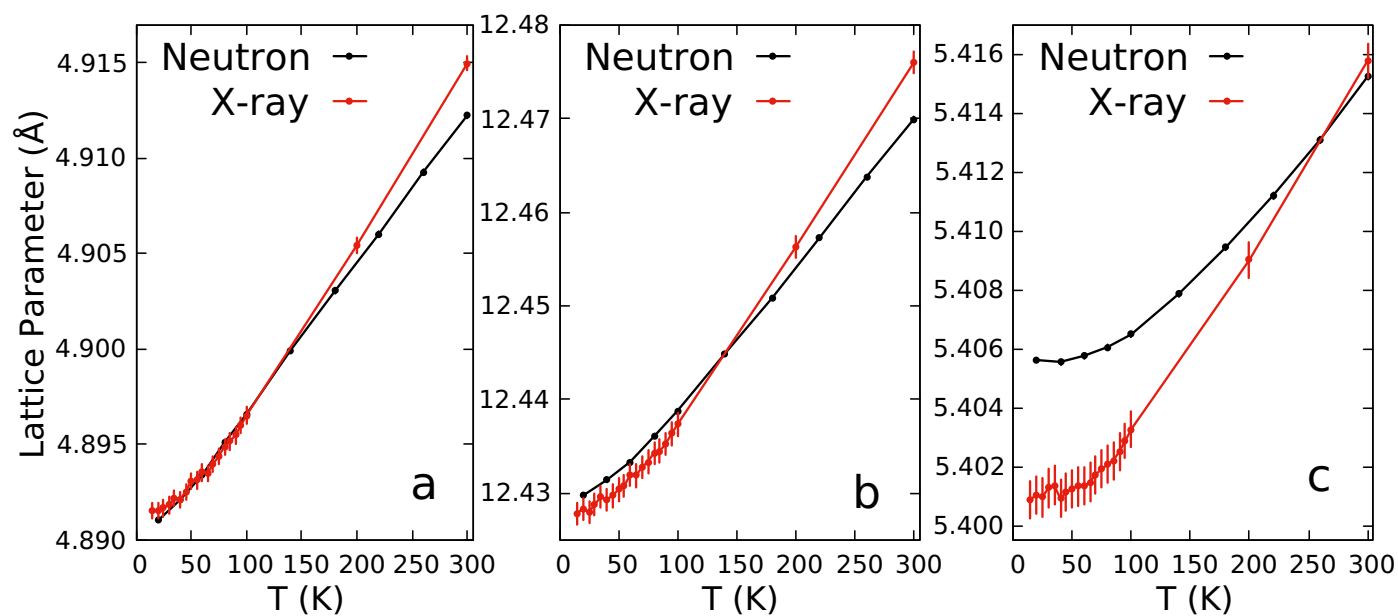

**Figure S5.** Temperature-dependent lattice constants of  $\beta$ -Sb<sub>2</sub>O<sub>3</sub> from both powder neutron diffraction and powder x-ray diffraction. Lattice parameters *a*, *b*, and *c* are labeled accordingly. When not visible, error bars are equivalent to point size.

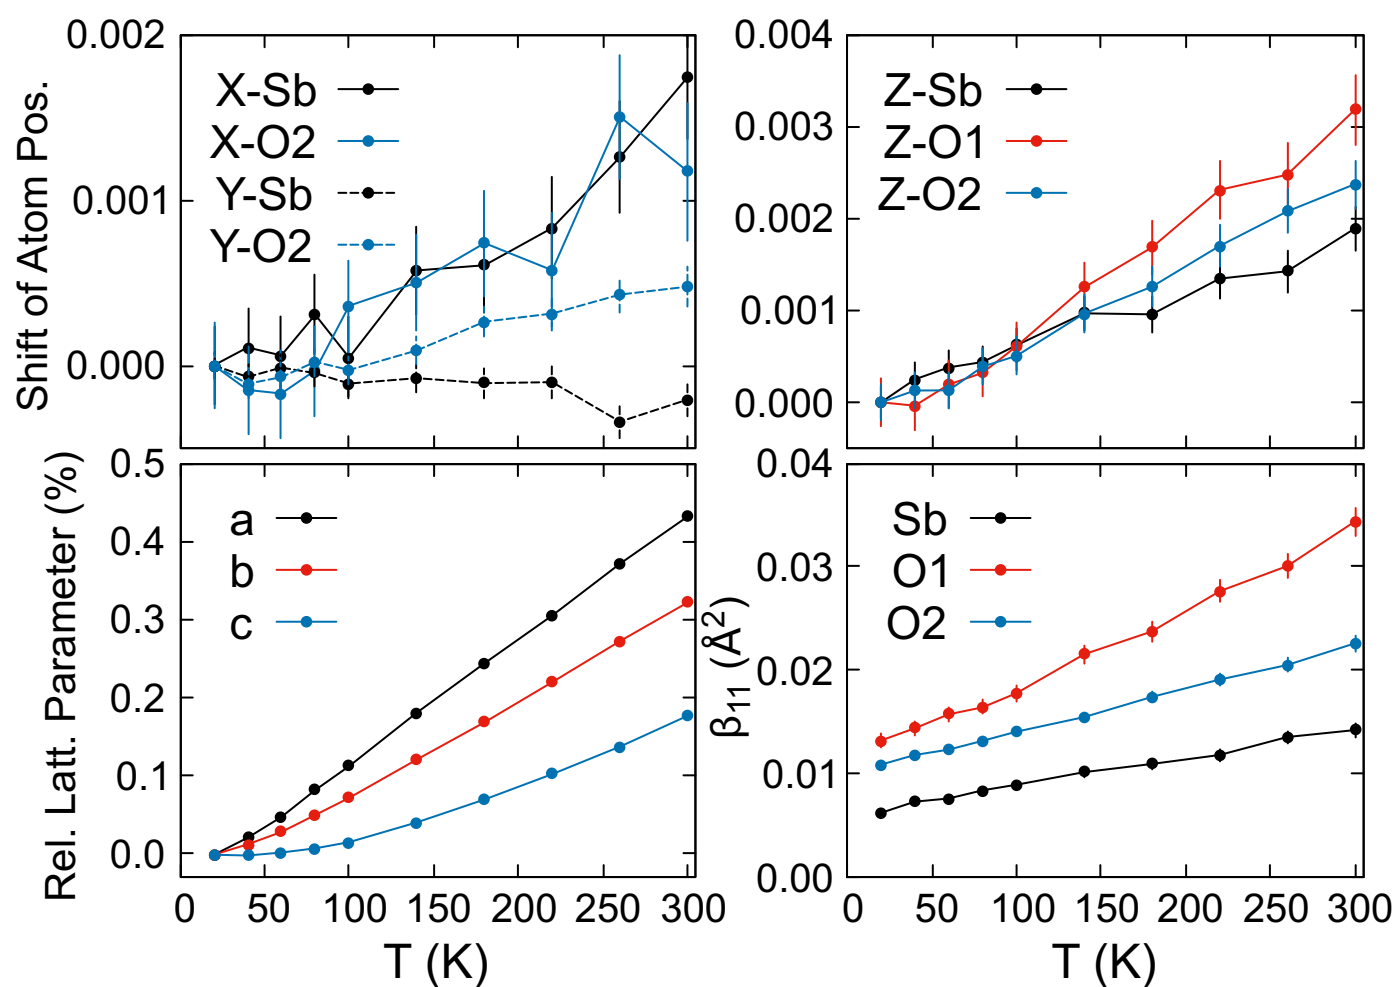

**Figure S6.** Temperature-dependent  $\beta$ - $\text{Sb}_2\text{O}_3$  Rietveld refinement parameters using anisotropic ADPs. (Top) Relative shift of atomic X, Y (Top-Left), and Z (Top-Right) coordinates for Sb and O atoms in fractional coordinates of the corresponding axis from 20 K. Values of X, Y, and Z for each atom at 20 K are given in Supplementary Table 1 below. (Bottom-Left) Relative lattice parameters given as a % difference from 20 K [a - 4.89103(7), b - 12.4297(2), c - 5.40561(7)]. (Bottom-Right) Anisotropic  $\beta_{11}$  ADP values for all atoms. Unless noted, error bars are approximately the size of the data points.

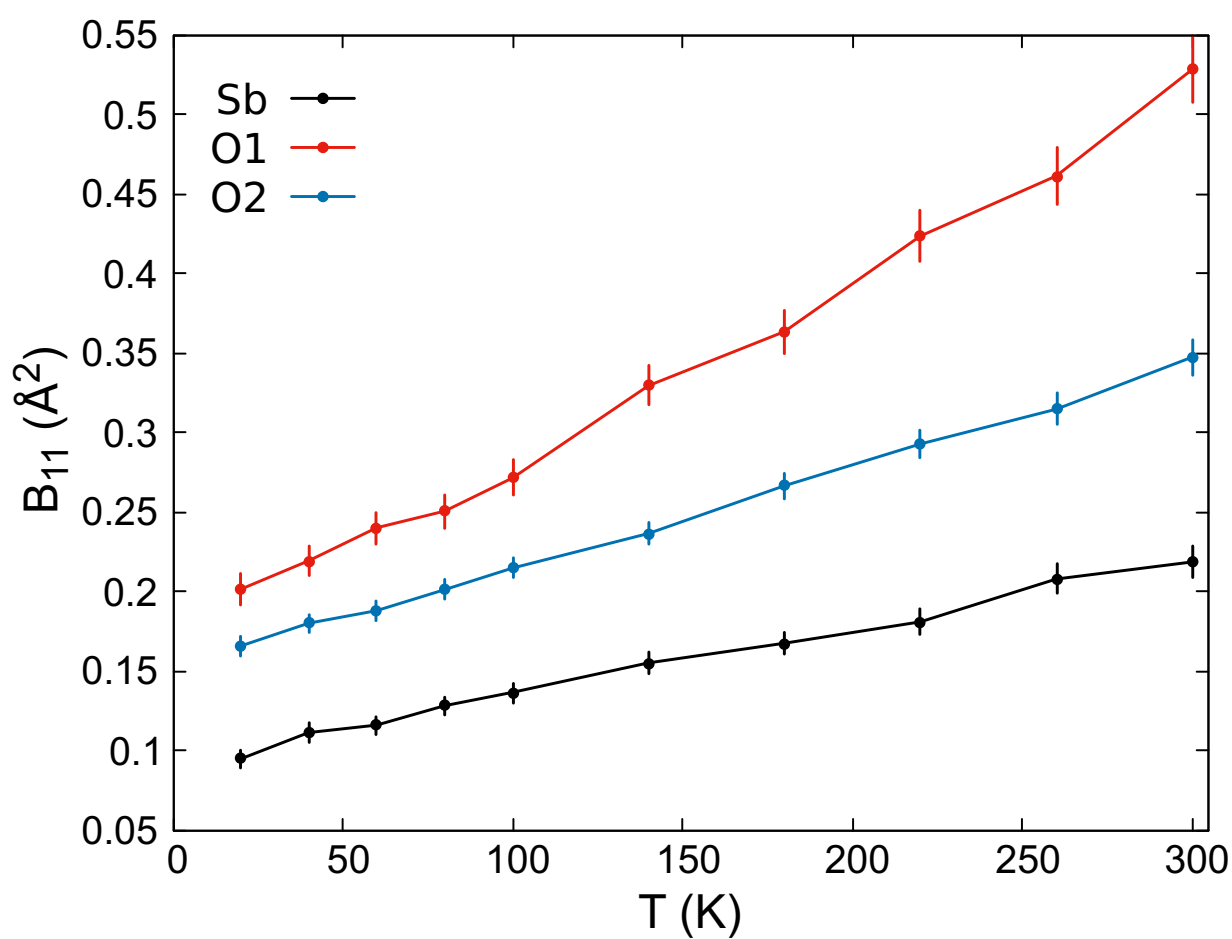

**Figure S7.** Temperature-dependent  $B_{11}$  parameters of  $\beta$ - $\text{Sb}_2\text{O}_3$  converted from the  $\beta_{11}$  values in Supplementary Fig. 2 as  $B_{11} = \beta_{11} \times 4/a^{*2}$ , where  $a^*$  is the reciprocal lattice vector.  $B_{11}$  is presented here for better comparison with the  $B_{iso}$  values presented in the main text.

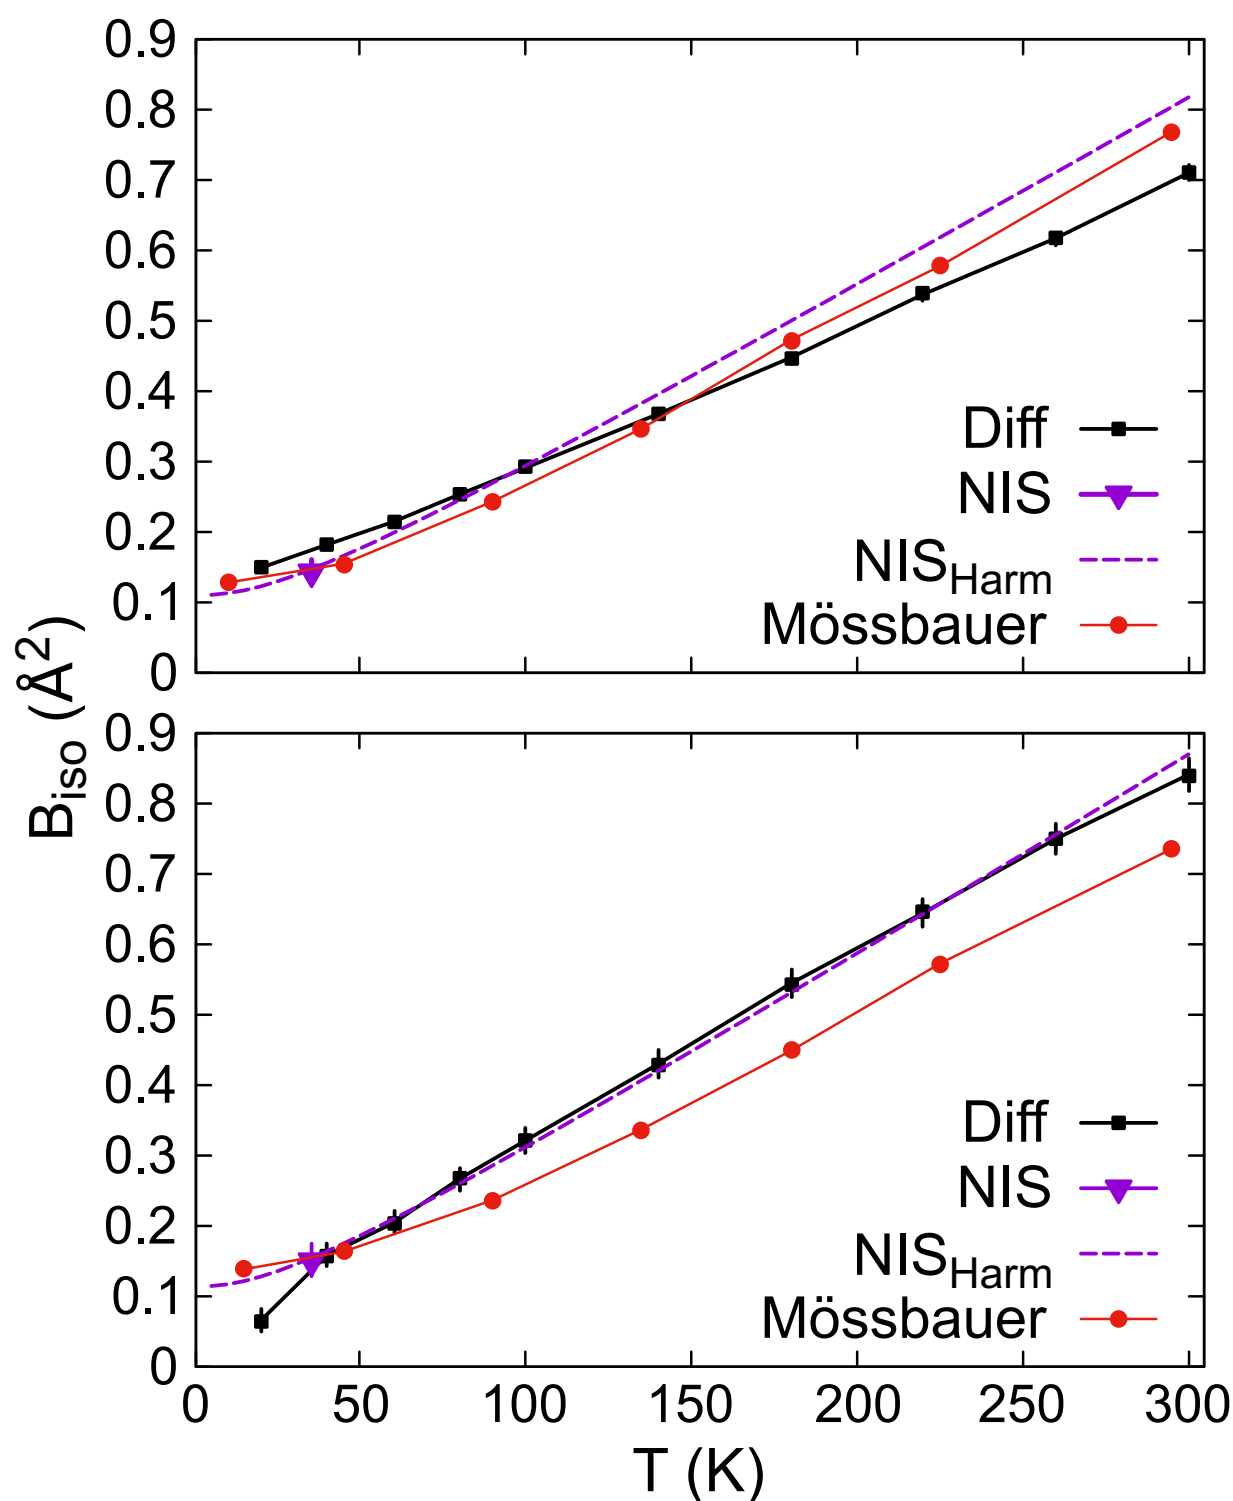

**Figure S8.** Temperature-dependent isotropic ADP values in  $\alpha$ - (Top) and  $\beta$ -Sb<sub>2</sub>O<sub>3</sub> (Bottom) compared with displacement parameters extracted from NIS and Mössbauer spectroscopy (Ref. 29 in the main text).



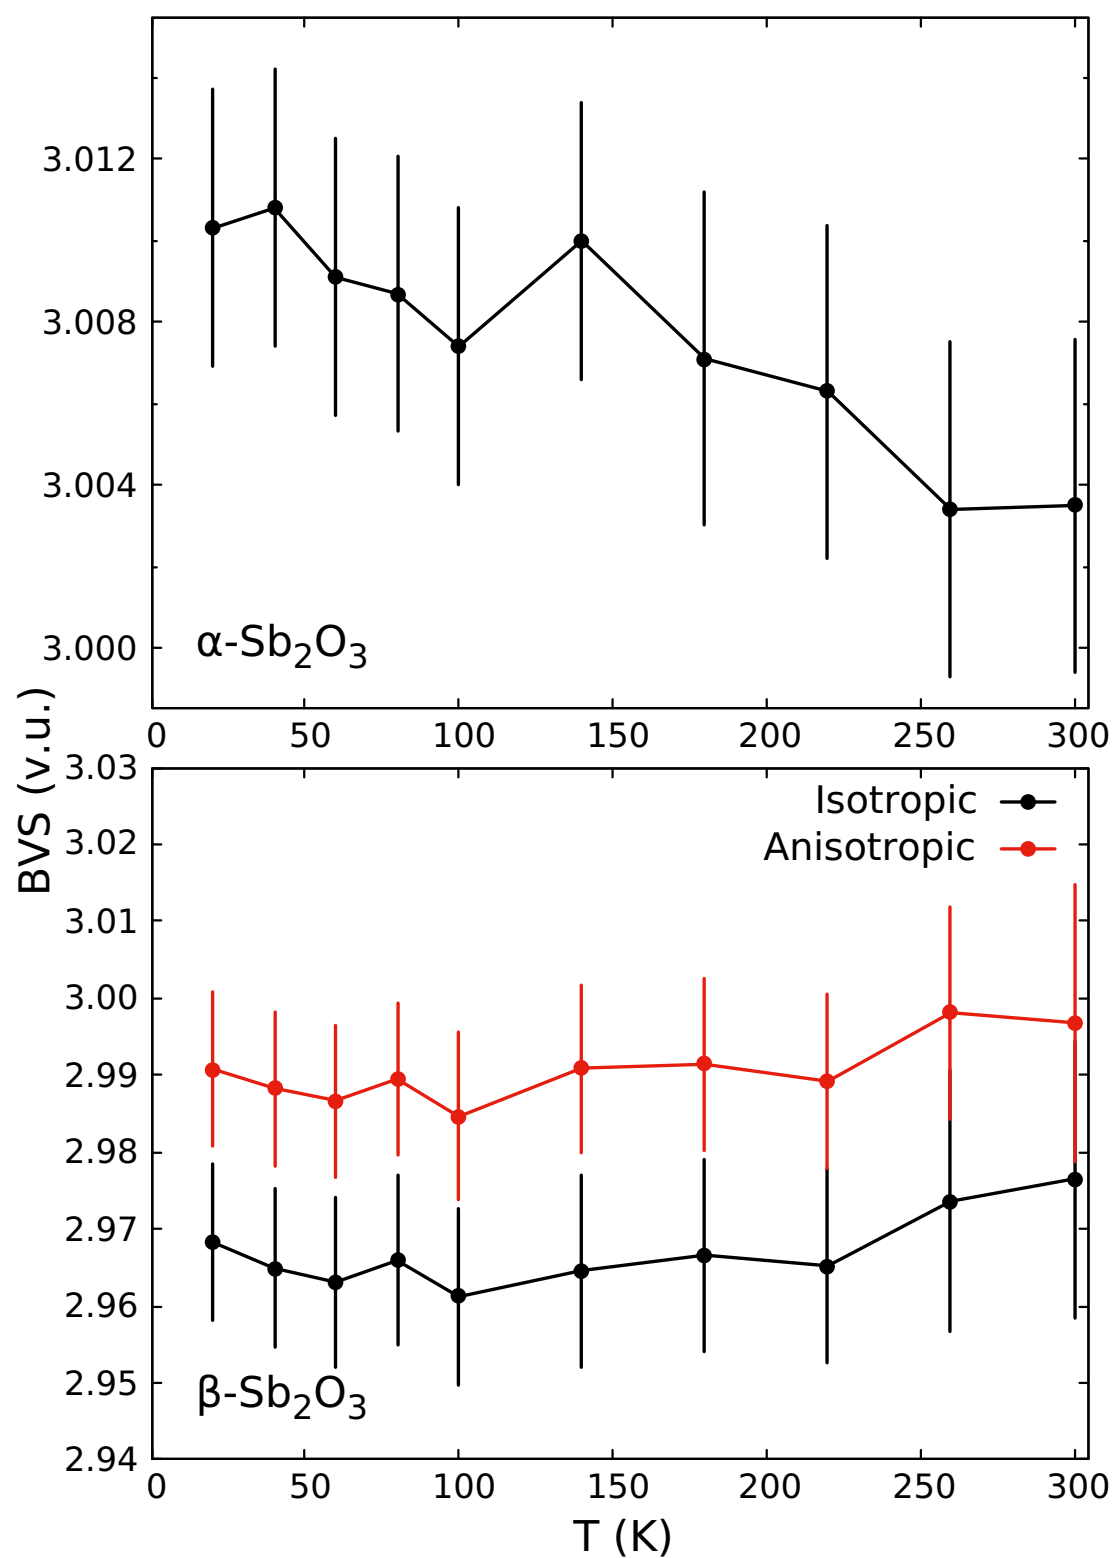

**Figure S9.** Comparison of temperature-dependent bond valence sum in  $\alpha$ - (Top) and  $\beta$ - $\text{Sb}_2\text{O}_3$  (Bottom). The  $\beta$  phase values are from fits with isotropic (black) and anisotropic (red) ADPs.

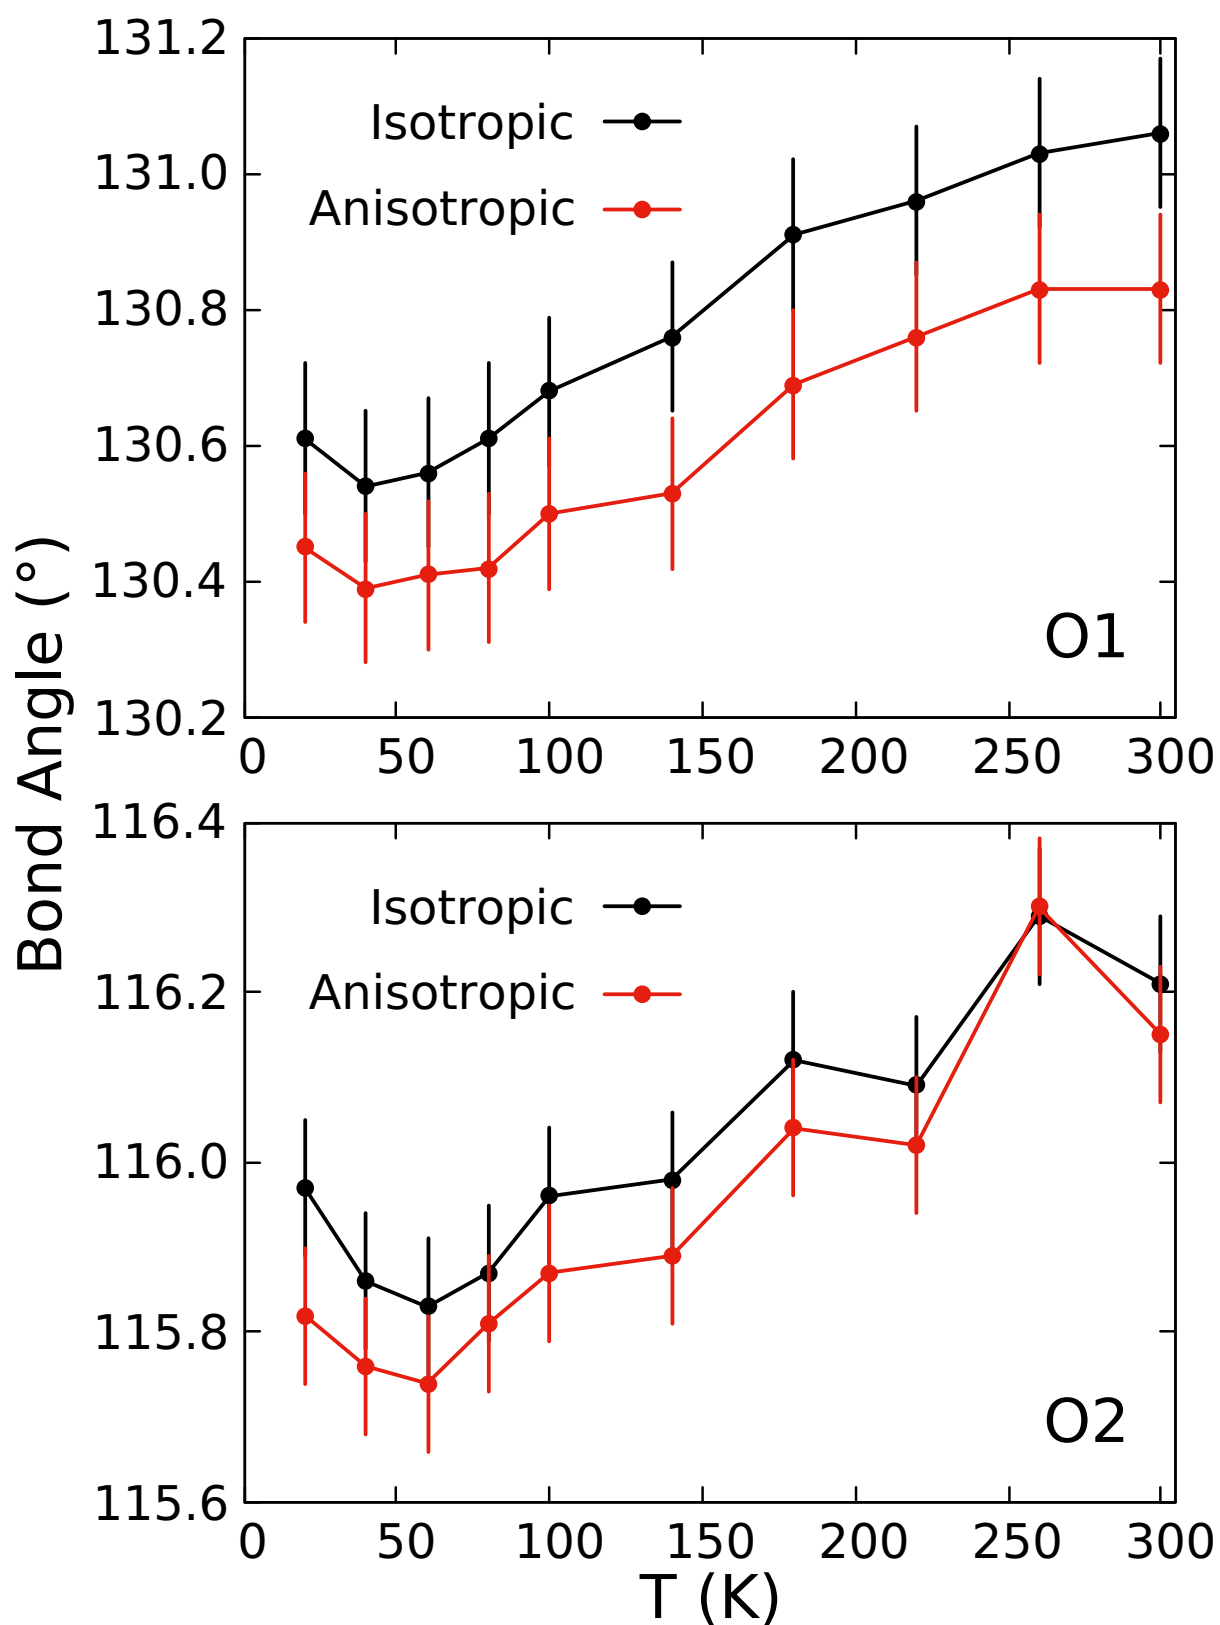

**Figure S10.** Comparison of temperature-dependent bond angles in  $\beta$ - $\text{Sb}_2\text{O}_3$  for both oxygen atoms O1 (Top) and O2 (Bottom) refined with either isotropic (black) or anisotropic (red) ADPs.
